# Supplementary material for: Increased Smad3 and reduced Smad2 levels mediate the functional switch of TGF-β from growth suppressor to growth and metastasis promoter through TMEPAI/PMEPA1 in triple negative breast cancer
Source: PubMed Central journal article supplement (PMC6872668; doi:10.18632/genesandcancer.194), 2019
Supplement: ganc-10-134-s001.pdf [file ganc-10-134-s001.pdf]

# Increased Smad3 and reduced Smad2 levels mediate the functional switch of TGF- $\beta$ from growth suppressor to growth and metastasis promoter through TMEPAI/PMEPA1 in triple negative breast cancer

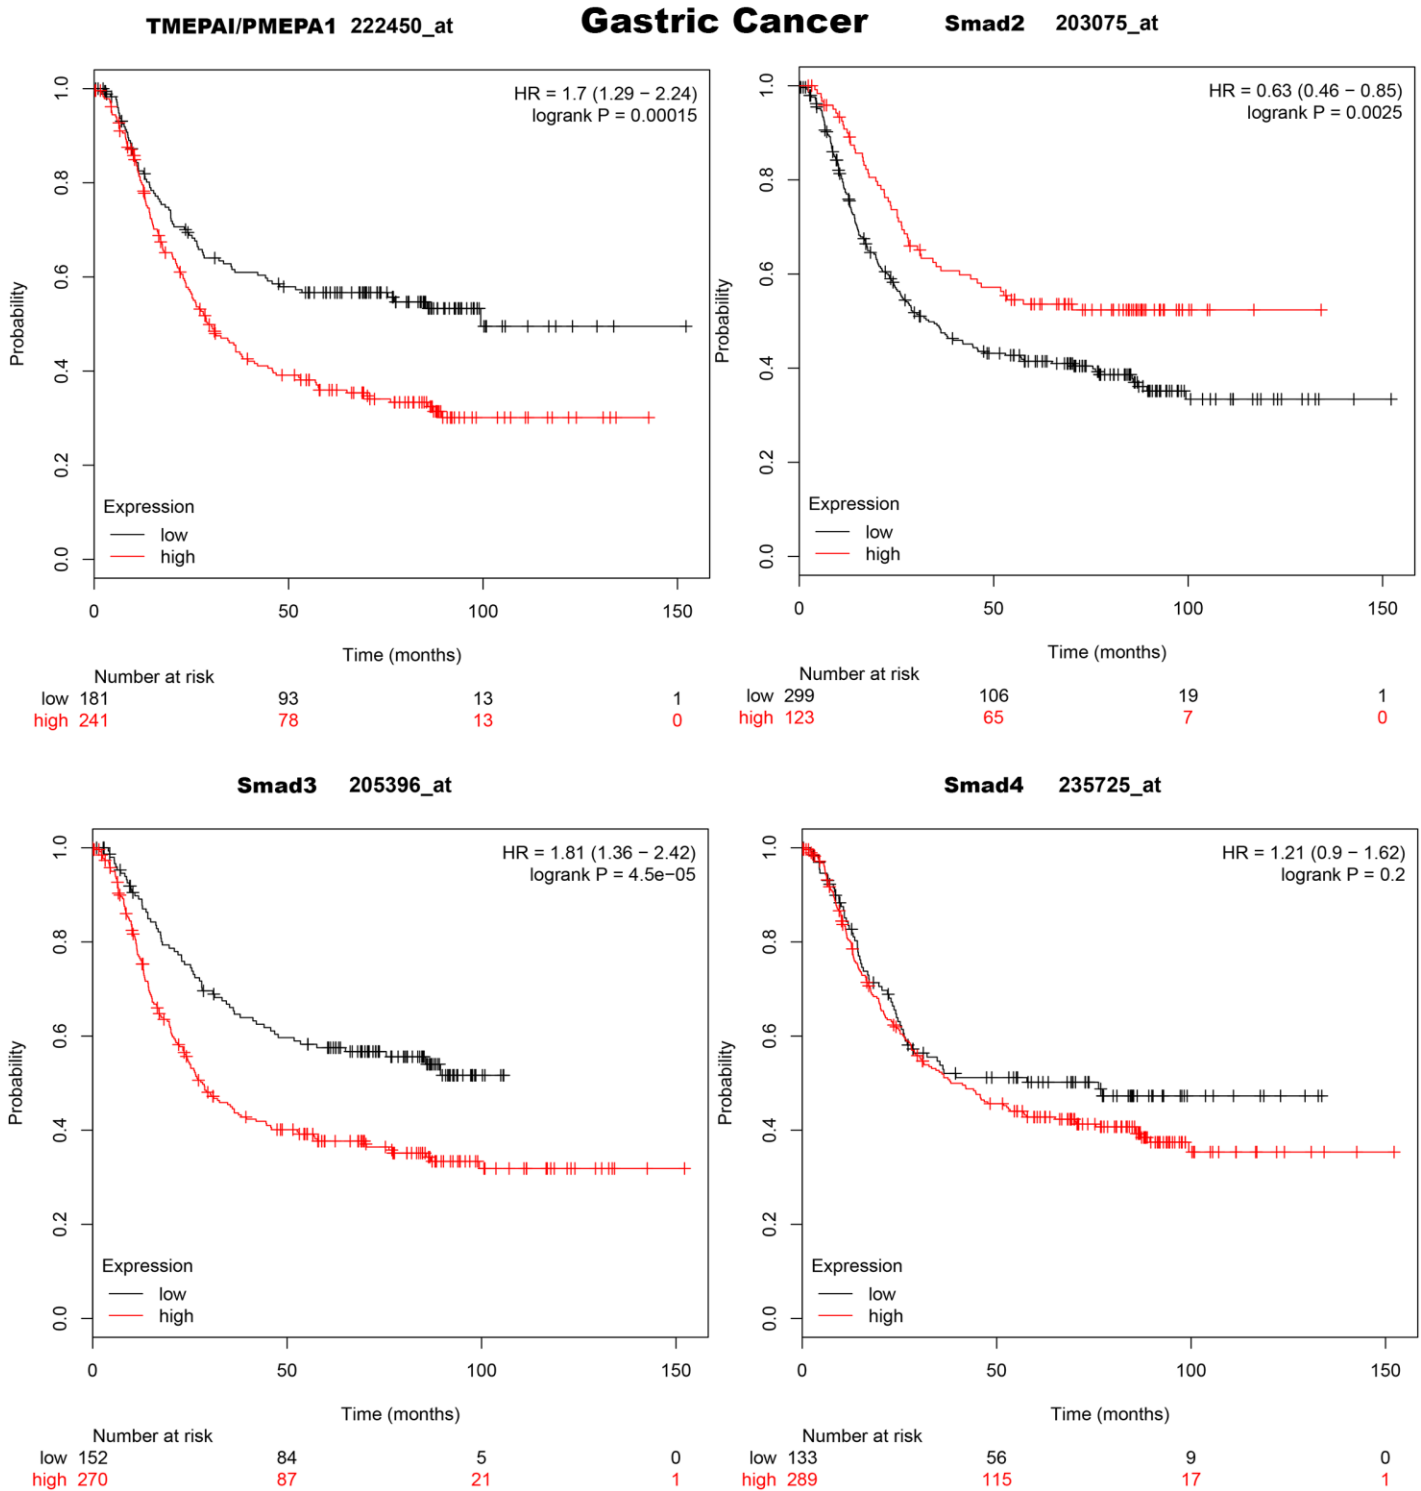

Supplementary Figure 1

**TMEPAI/PMEPA1 217875\_s\_at Lung Adenocarcinoma Smad2 203075\_at**

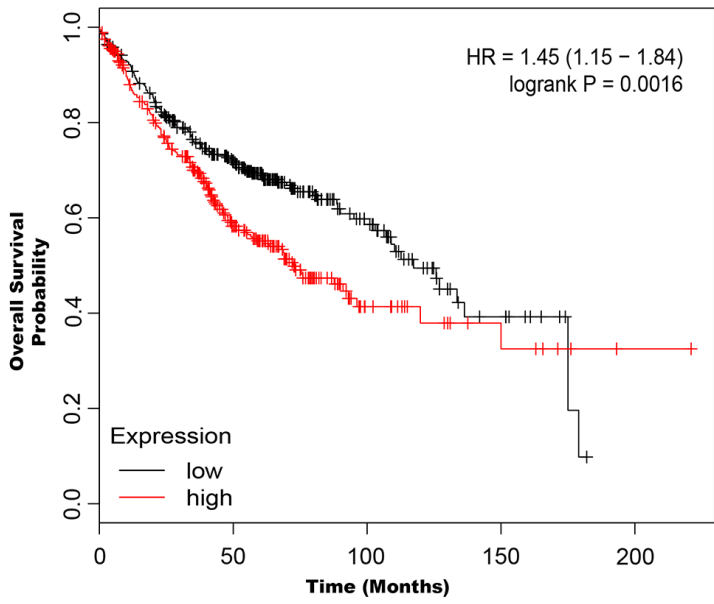

| Number at risk |     |     |    |   |
|----------------|-----|-----|----|---|
| low            | 360 | 206 | 12 | 0 |
| high           | 360 | 142 | 19 | 7 |

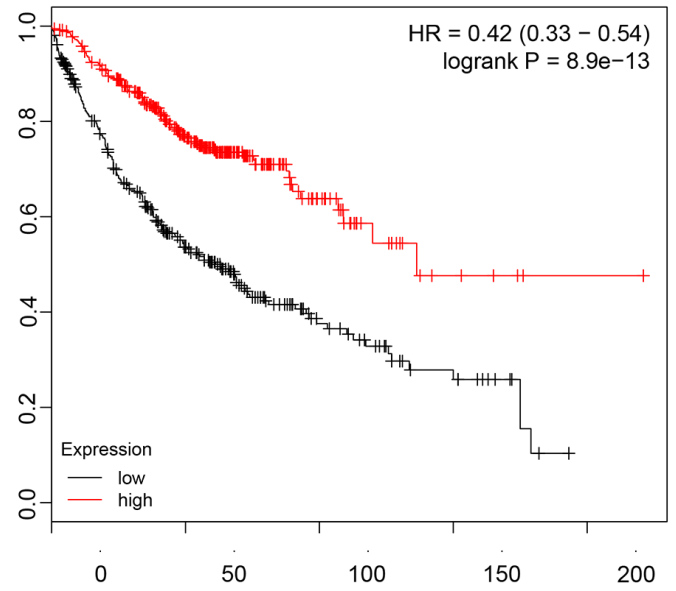

| Number at risk |     |     |    |    |
|----------------|-----|-----|----|----|
| low            | 360 | 145 | 35 | 14 |
| high           | 360 | 203 | 34 | 5  |

**Smad3 205396\_at**

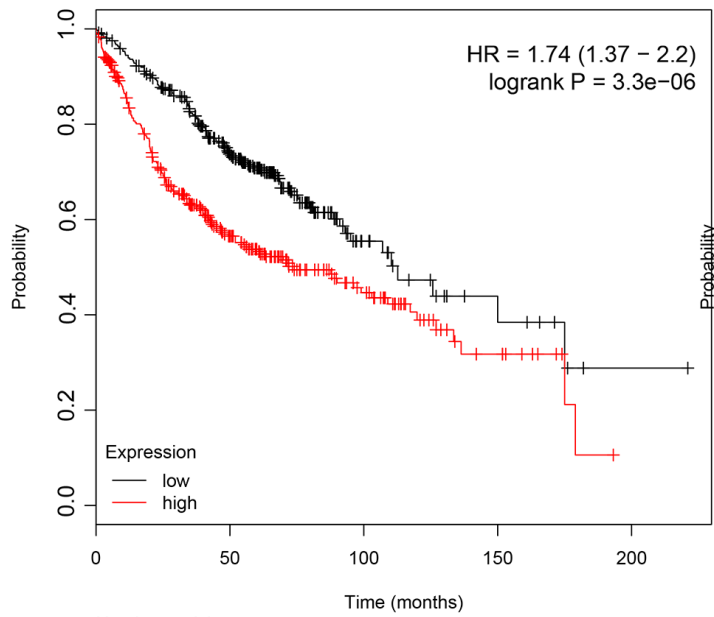

| Number at risk |     |     |    |    |
|----------------|-----|-----|----|----|
| low            | 365 | 215 | 26 | 8  |
| high           | 355 | 133 | 43 | 11 |

**Smad4 202526\_at**

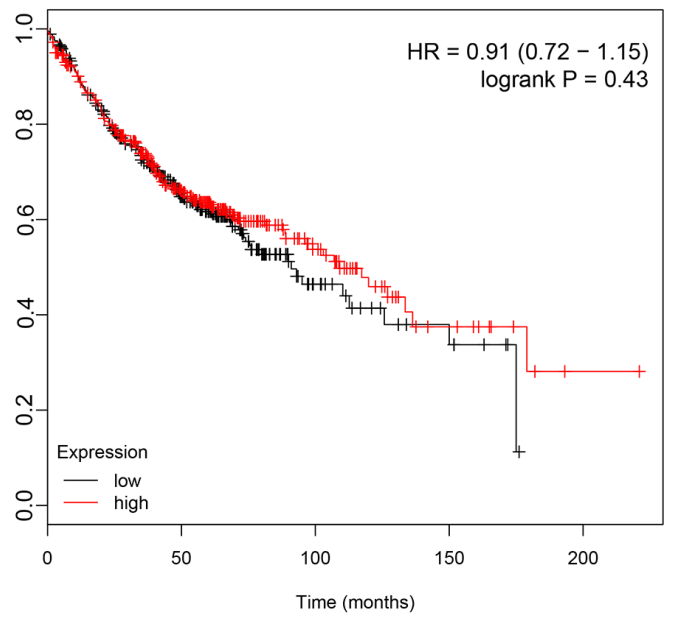

| Number at risk |     |     |    |    |
|----------------|-----|-----|----|----|
| low            | 361 | 180 | 24 | 9  |
| high           | 359 | 168 | 45 | 10 |

**Supplementary Figure 2**
